# Supplementary material for: B7-H3 in Medulloblastoma-Derived Exosomes; A Novel Tumorigenic Role
Source: MDPI journal article supplement (doi:10.3390/ijms21197050), 2020-09-25

**Supplementary Figure 1: B7-H3 levels in MB cells.** A. Western blot analysis of D283 control and B7-H3\_OE cell lysates to check the B7-H3 levels. B. Western blot showing levels of B7-H3 in different MB cell lysates. Actin was used as a loading control.

**Supplementary Figure 2: F-actin and Calcein AM stains.** A. The negative control to confirm non-specific Calcein AM staining was done using SFM (processed in the same way as exosome extraction) overlayed on D458 cells followed by F-actin staining. B. D458 cells incubated with Calcein AM reagent (positive control).

**Supplementary Figure 3: Original Immunoblots.** Original full-length immunoblot blots that correspond to Figure 3C in the manuscript. Actin was used as a loading control.

**A**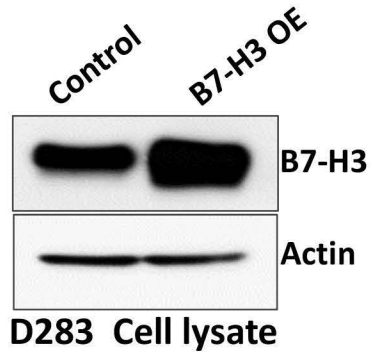**B**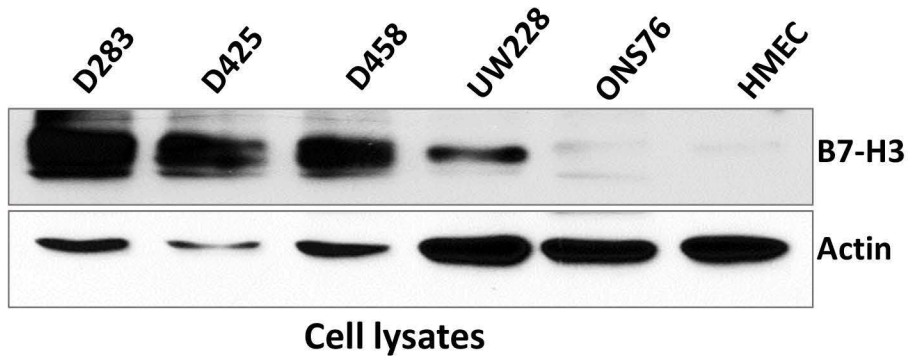

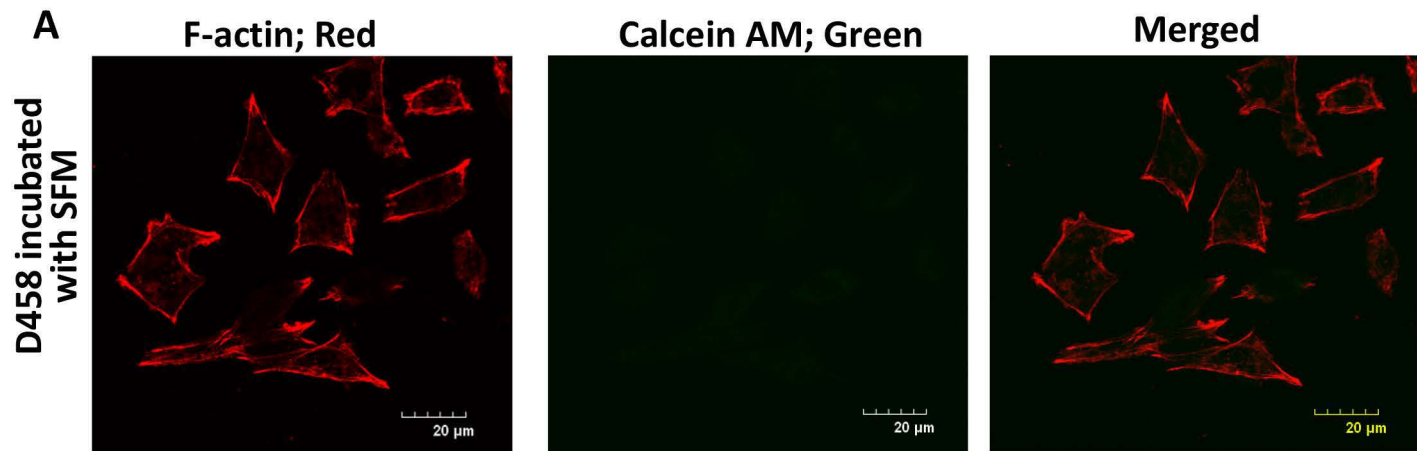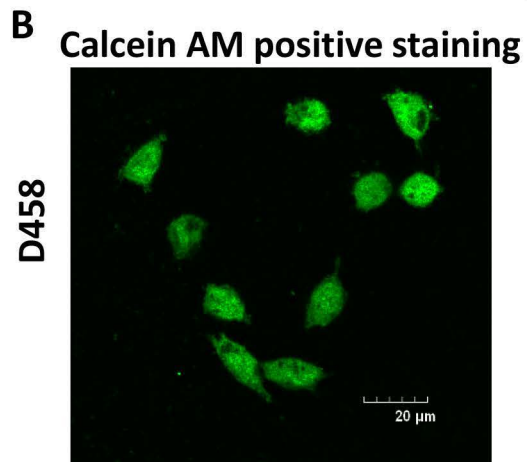

Fig 3C\_B7-H3 blot

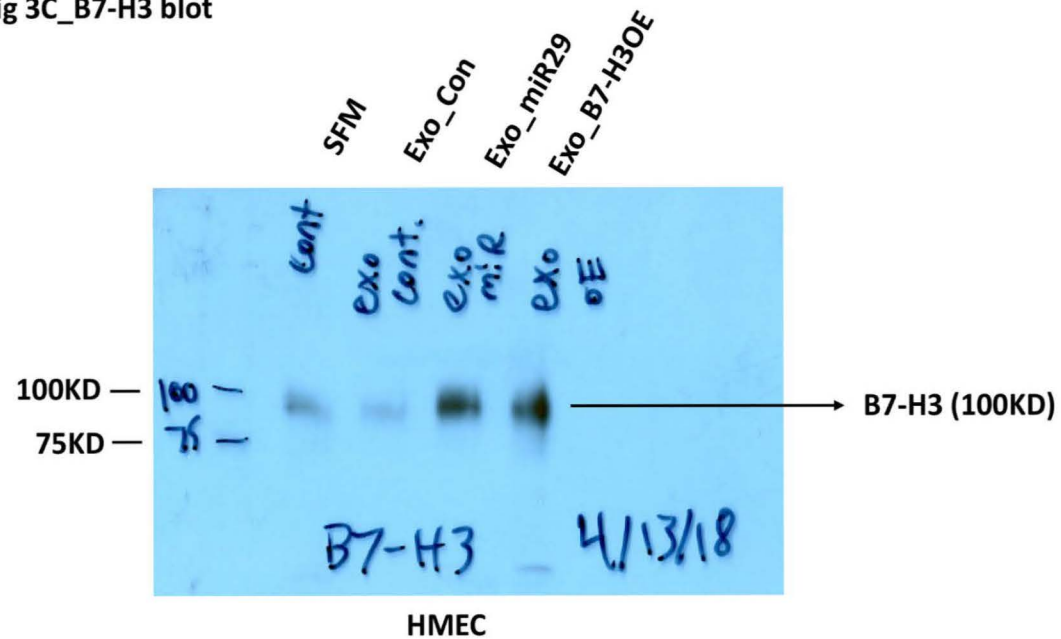

Fig 3C\_Actin blot

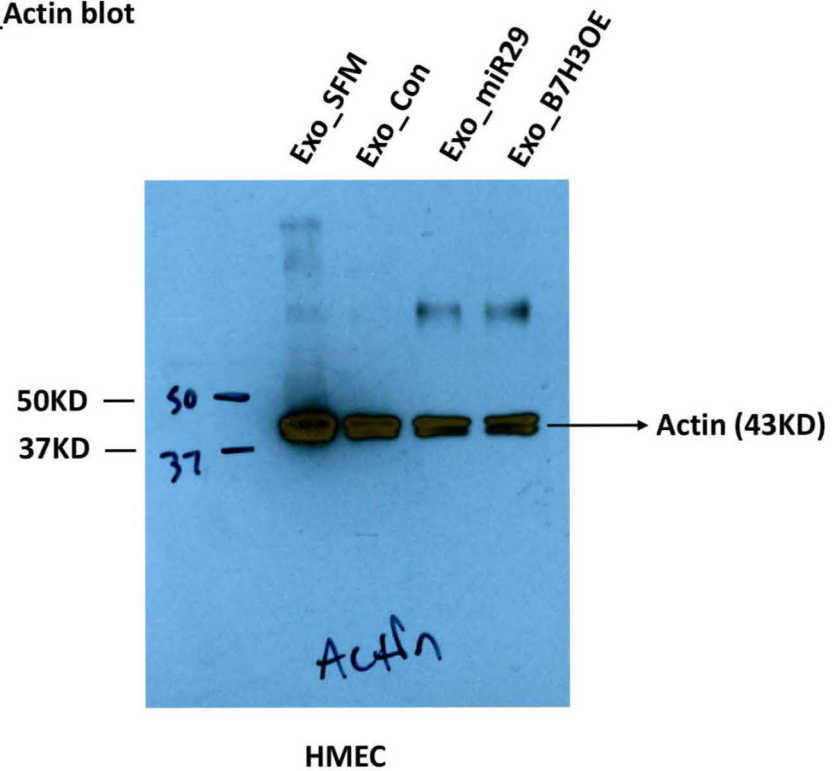

Supplement: s1 [file s1]
